# Supplementary material for: Candidate Genes and Pathways in Rice Co-Responding to Drought and Salt Identified by gcHap Network
Source: MDPI journal article supplement (doi:10.3390/ijms23074016), 2022-04-05
Supplement: s1 [file s1]

**A**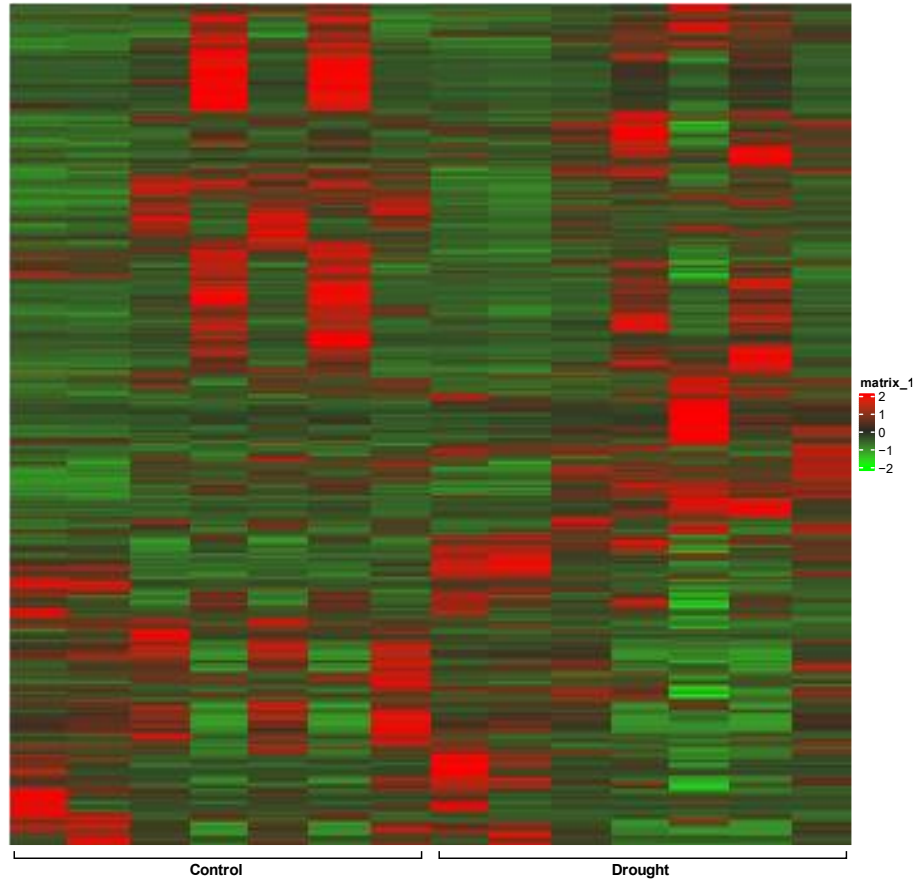**B**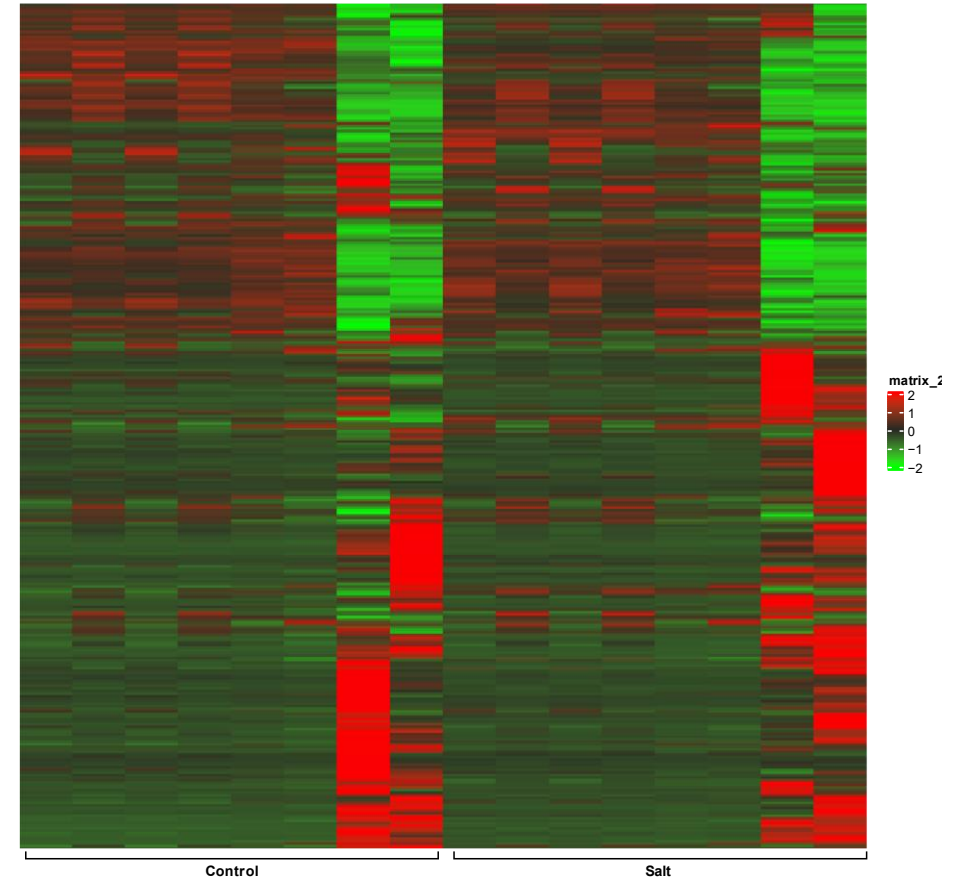

Supplementary Figure S1. Cluster analysis of all DEGs in different tissues under drought (**A**) and salt (**B**) treatments.

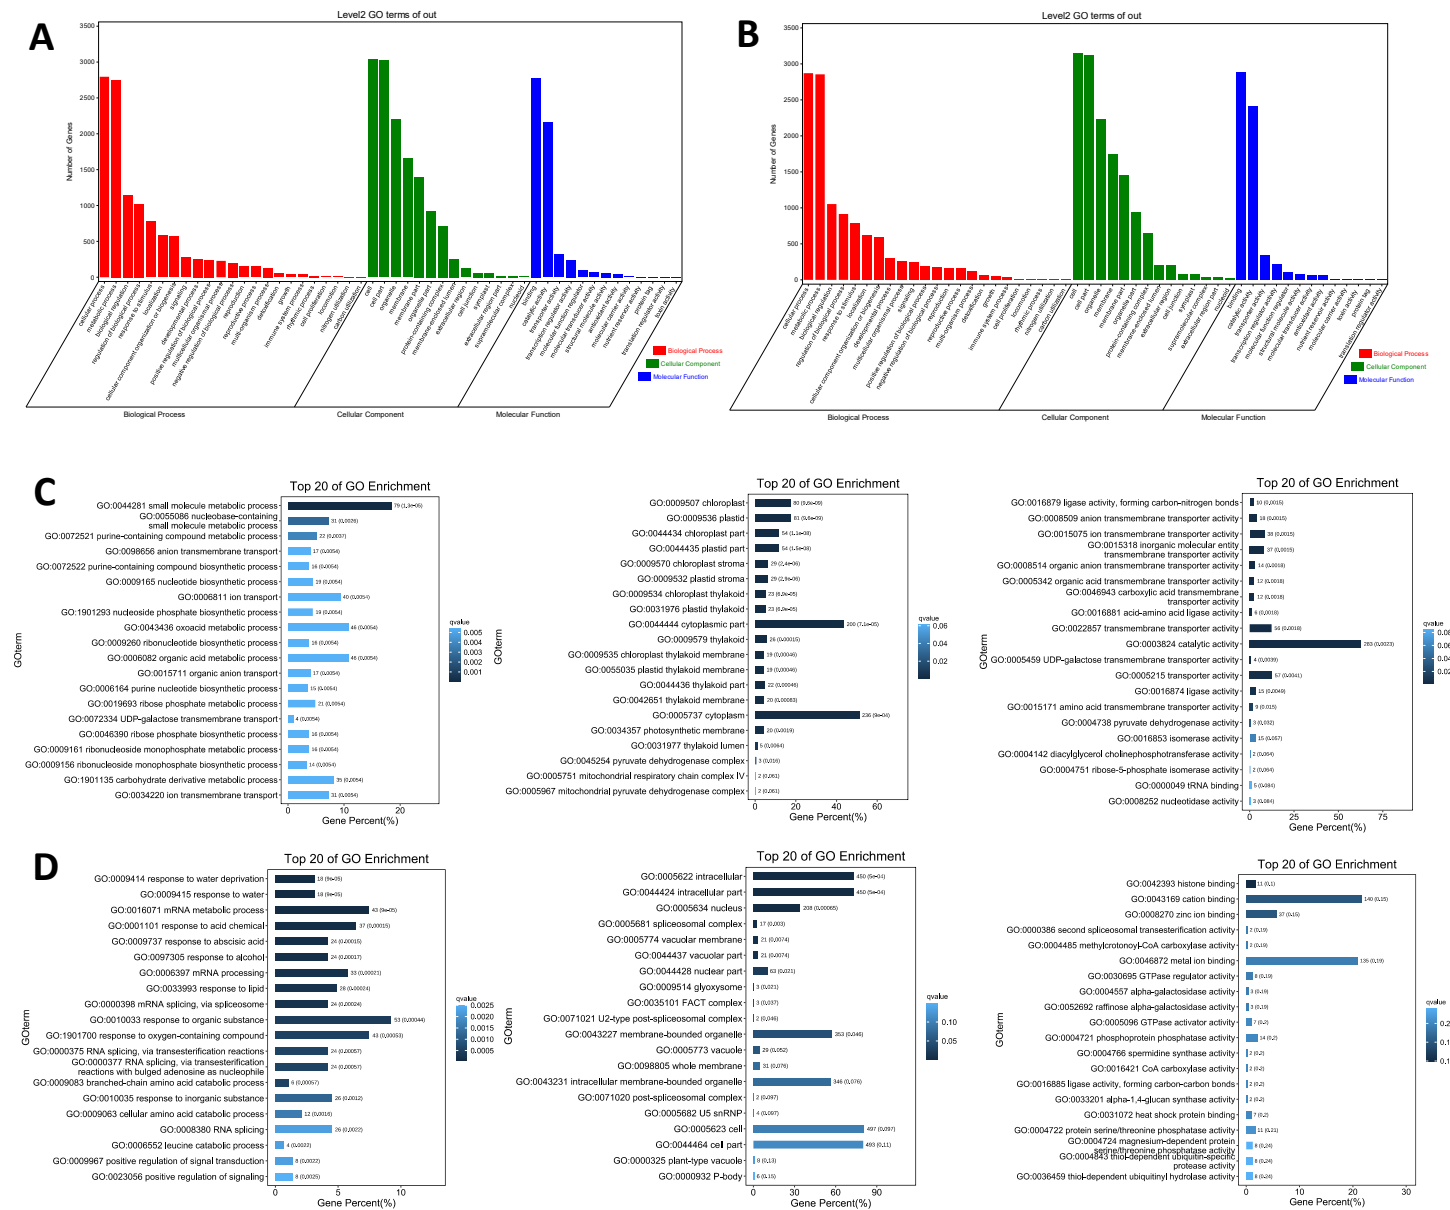

Supplementary Figure S2. (A) Gene ontology (GO) classification of drought-related genes. (B) GO classification of salt-related genes. (C) Significantly GO enrichment of up-regulated drought and salt co-response genes in biological process (BP), cellular process (CC) and molecular function (MF) terms. (D) Significantly GO enrichment of down-regulated drought and salt co-response genes in BP, CC, MF terms.

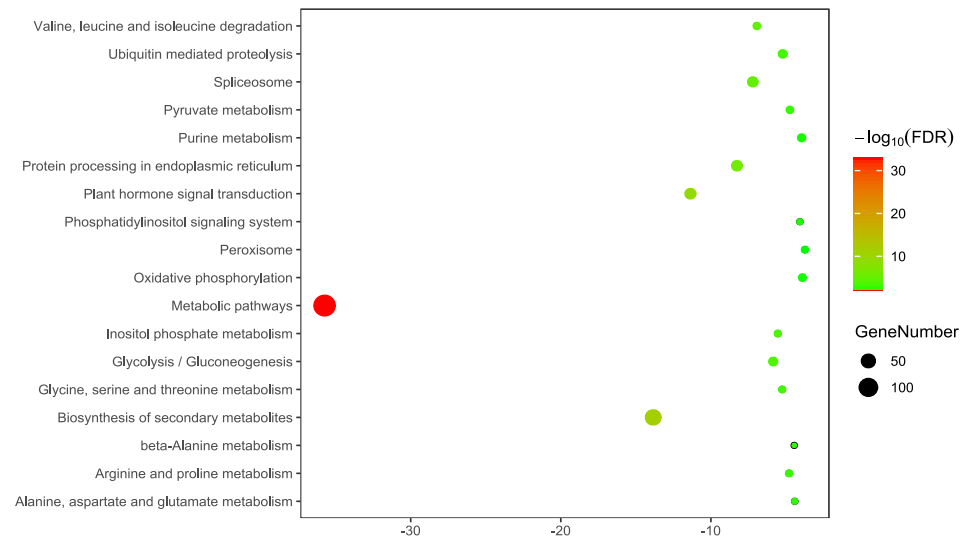

Supplementary Figure S3. KEGG analysis of drought and salt co-response genes.

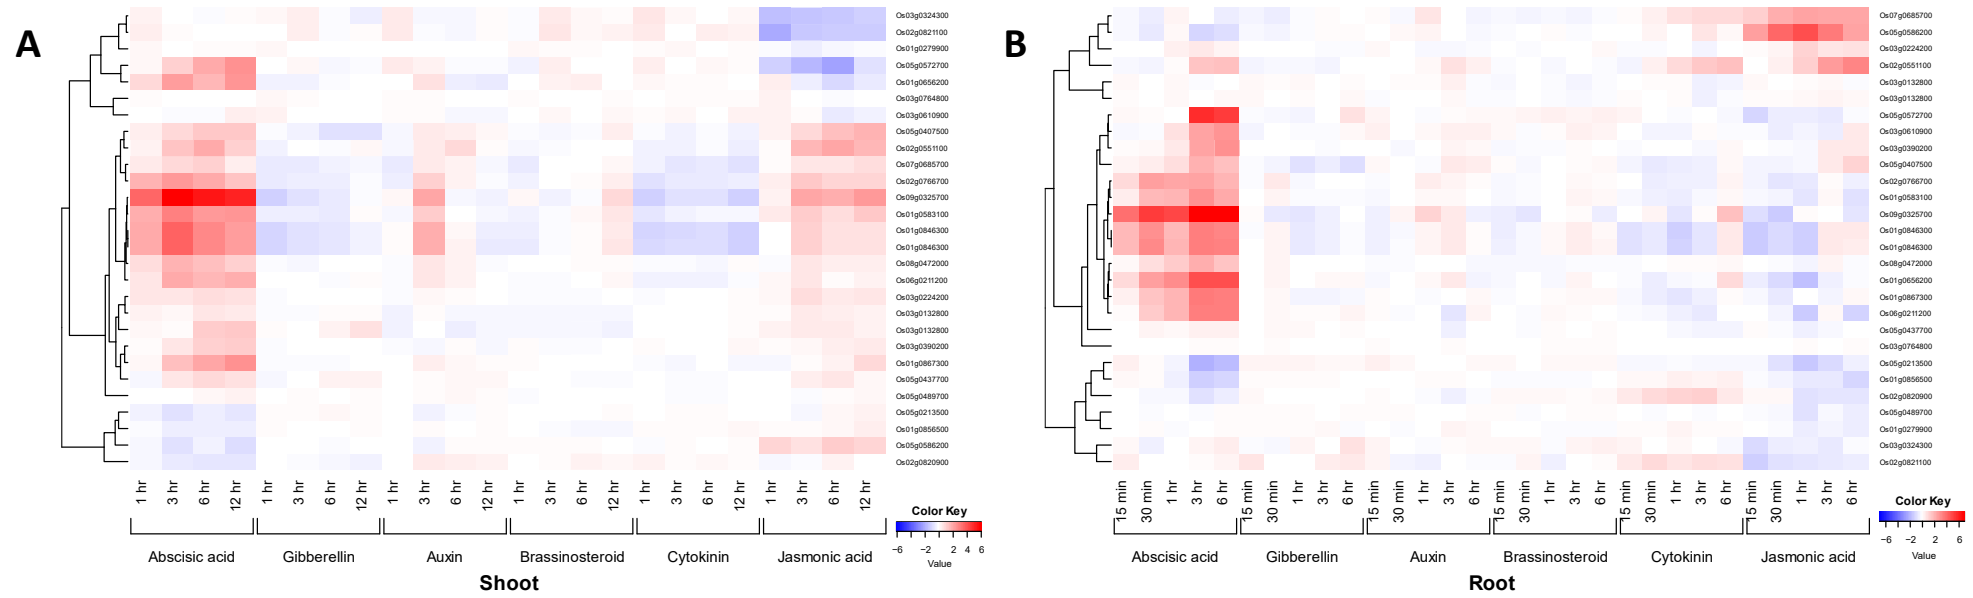

Supplementary Figure S4. The heatmap of 24 candidate genes expression under hormone treatments between **(A)** shoot and **(B)** root.

A

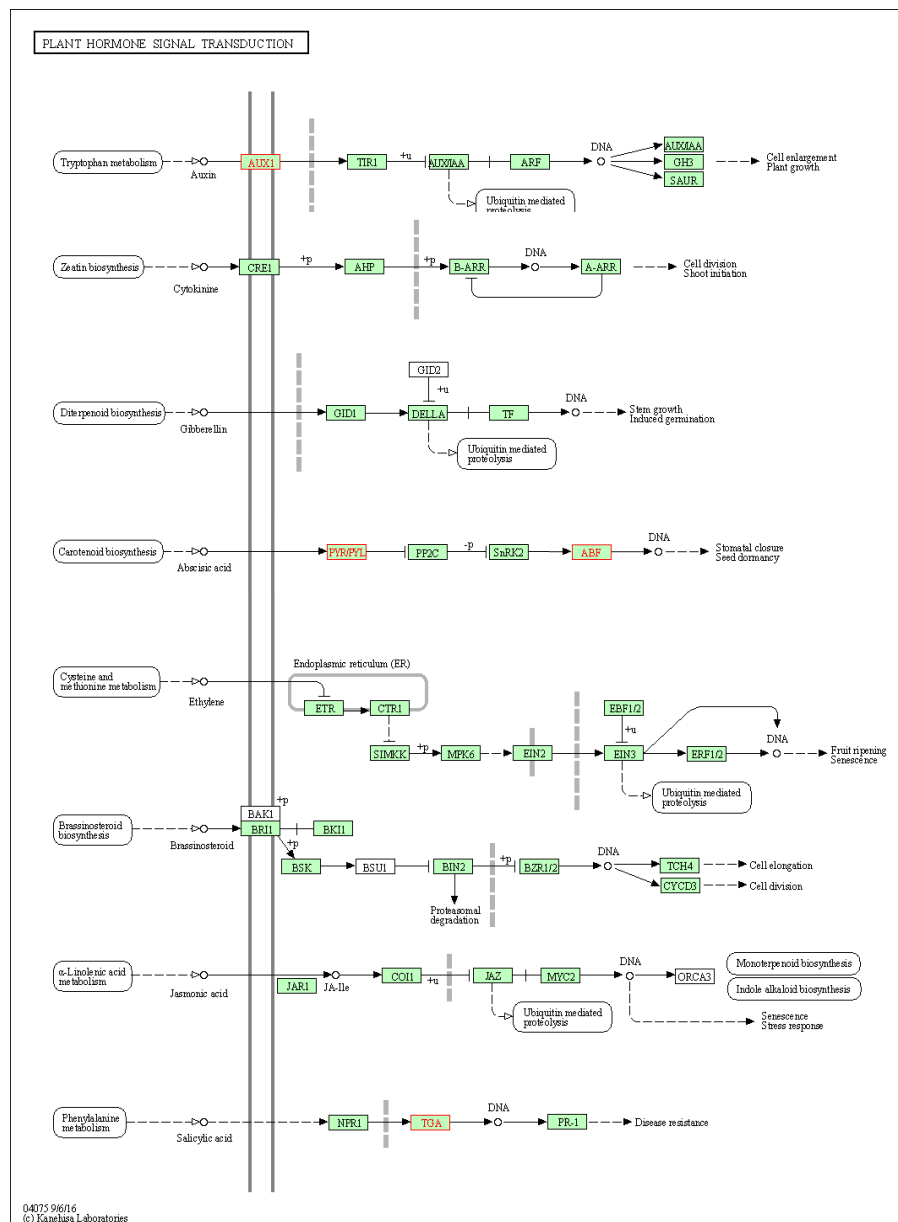

B

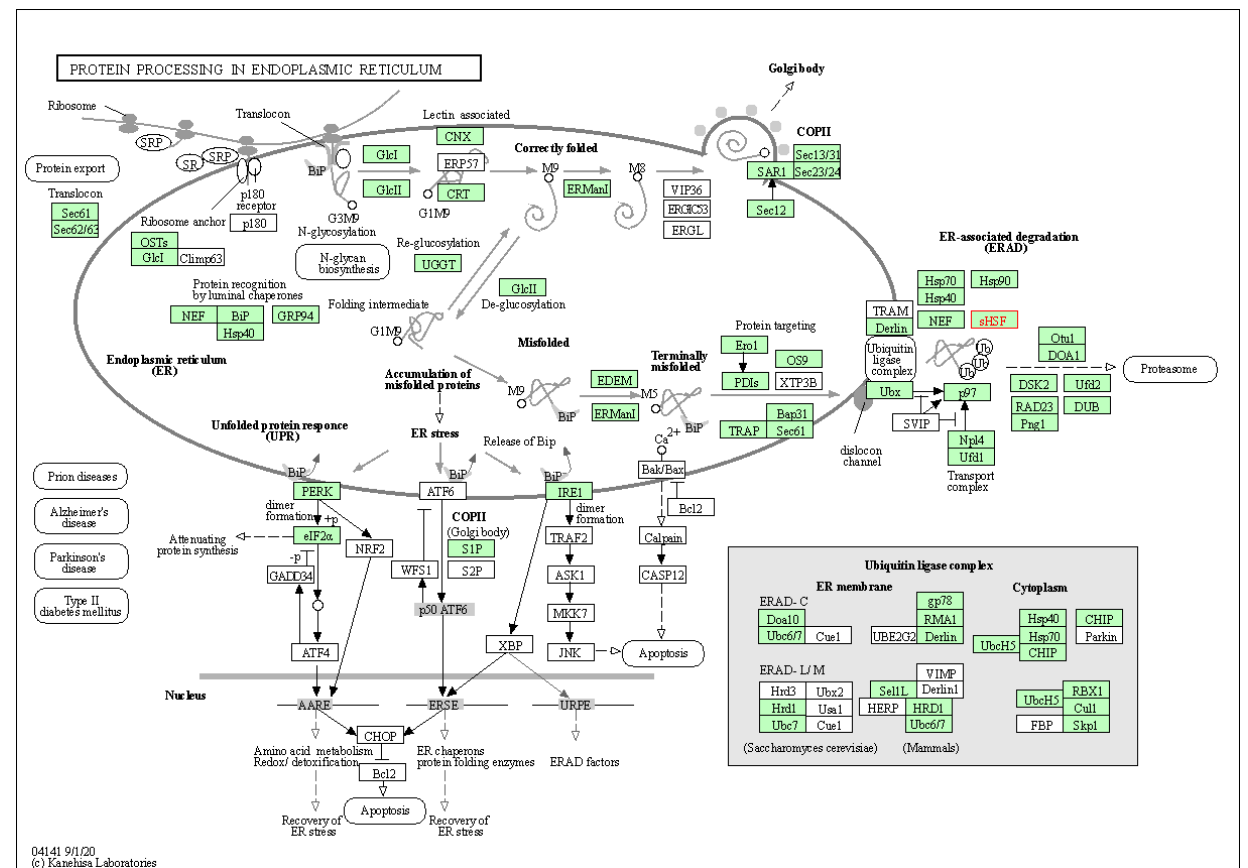

Supplementary Figure S5. KEGG pathway analysis of (A) osa04075 (plant hormone signal transduction) and (B) osa04141 (protein processing in endoplasmic reticulum).

*OsAUX1*  
*Os01g0856500*

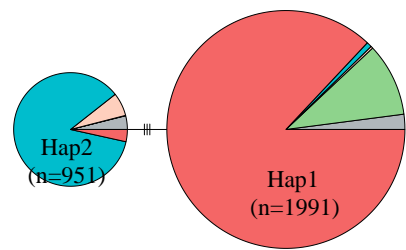

*OsPYL5*  
*Os05g0213500*

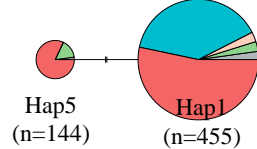

*OsHSP17.0*  
*Os01g0136200*

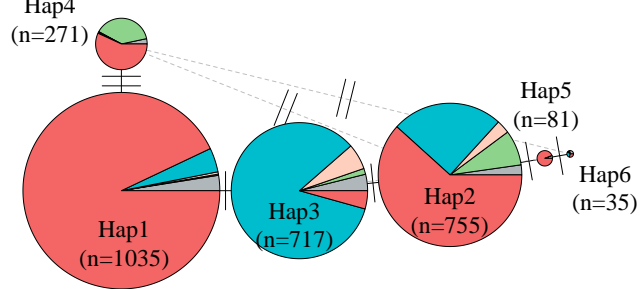

*OsZIP23*  
*Os02g0766700*

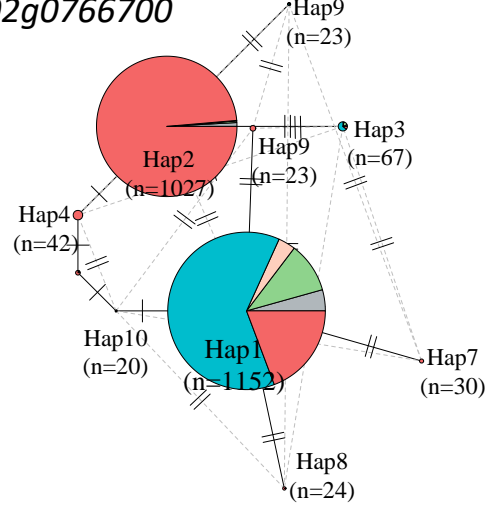

*OsZIP42*  
*Os05g0489700*

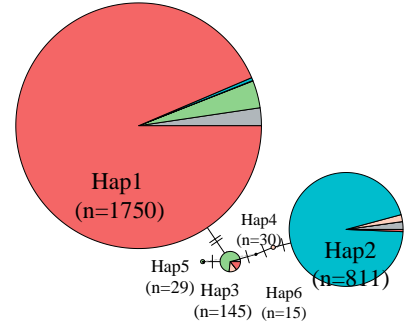

*OsZIP46*  
*Os06g0211200*

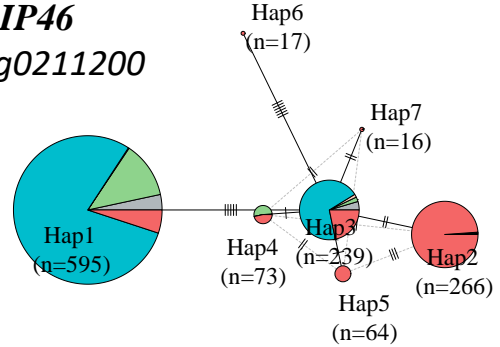

*OsMPKKK63*  
*Os01g0699100*

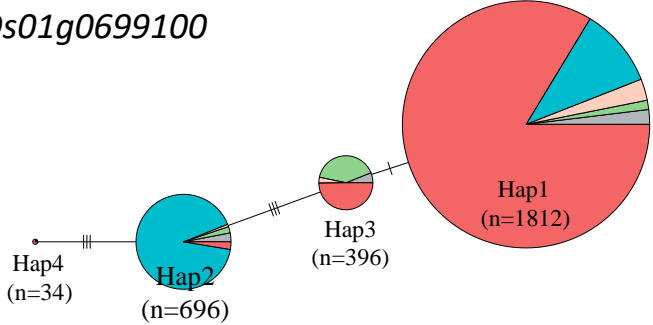

*OsMPK3*  
*Os03g0285800*

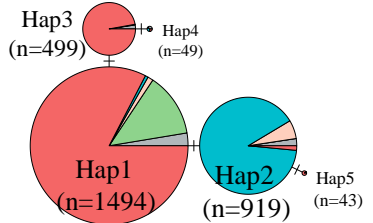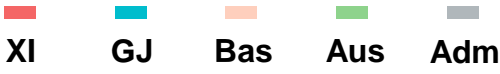

Supplementary Figure S6. Haplotype networks of seven DT and ST co-response genes in 3KRG.
